# Supplementary material for: Facile preparation of nickel phosphide for enhancing the photoelectrochemical water splitting performance of BiVO4 photoanodes
Source: Royal Society of Chemistry journal article supplement (doi:10.1039/d3ra00346a), 2023-01-01
Supplement: d3ra00346a1.pdf [file d3ra00346a1.pdf]

*Supporting information*

**Facile preparation of nickel phosphide for enhancing the photoelectrochemical water splitting performance of BiVO<sub>4</sub> photoanode**

Yongsheng Li<sup>a</sup>, Zhen Li<sup>b,c</sup>, Chengwen Xu<sup>b,c</sup>, Shuangwei Yu<sup>b,c</sup>, Zijun Sun<sup>\*b,c</sup>

<sup>a</sup>China Academy of Science & Technology Development Guangxi Branch, Nanning 530001, China

<sup>b</sup>School of Automation, Guangxi University of Science and Technology, Liuzhou 545006, China

<sup>c</sup>Guangxi Colleges and Universities Key Laboratory of Microwave Communication and Micro-Nano Photoelectric Technology, School of Electronic Engineering, Guangxi University of Science and Technology, Liuzhou 545006, China

\*Corresponding author.

E-mail addresses: [sunzijun@gxust.edu.cn](mailto:sunzijun@gxust.edu.cn)

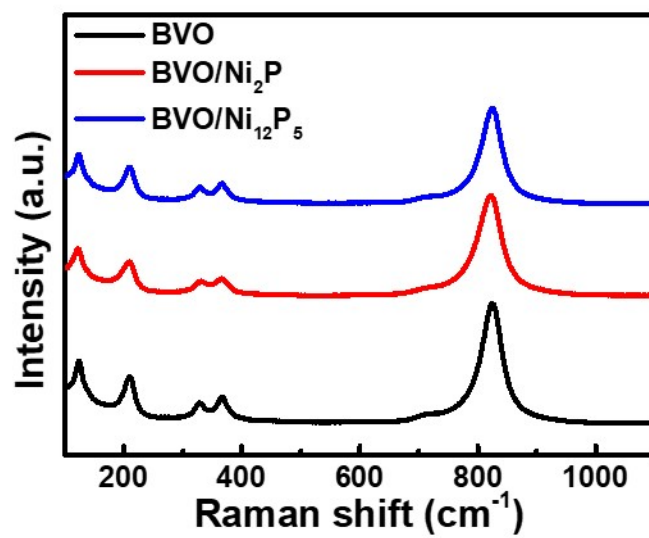

**Fig. S1** Raman spectra of the BVO, BVO/Ni<sub>2</sub>P, and BVO/Ni<sub>12</sub>P<sub>5</sub> photoanodes.

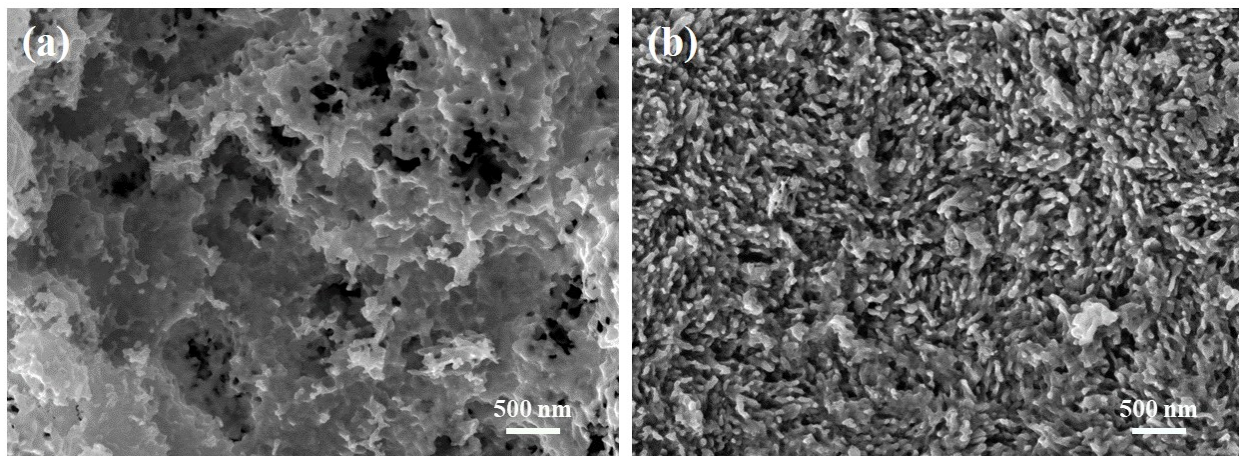

**Fig. S2** SEM images of **(a)** Ni<sub>2</sub>P and **(b)** Ni<sub>12</sub>P<sub>5</sub>.

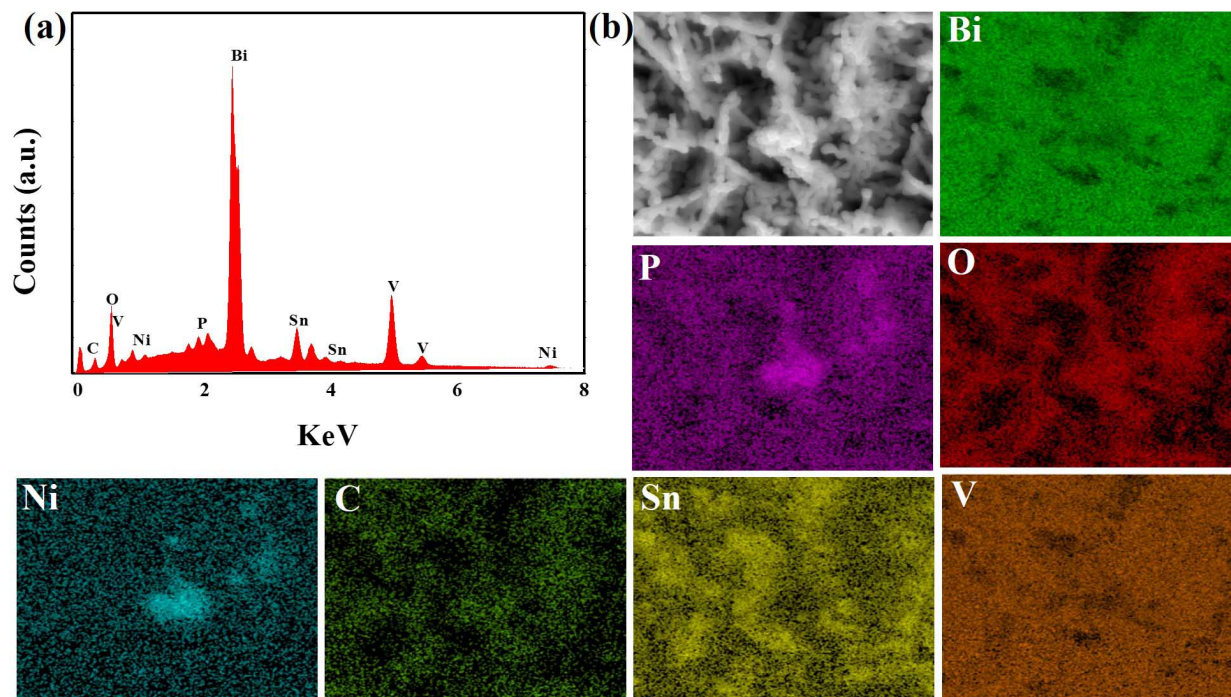

Fig. S3 EDX analysis of BVO/Ni<sub>2</sub>P photoanode.

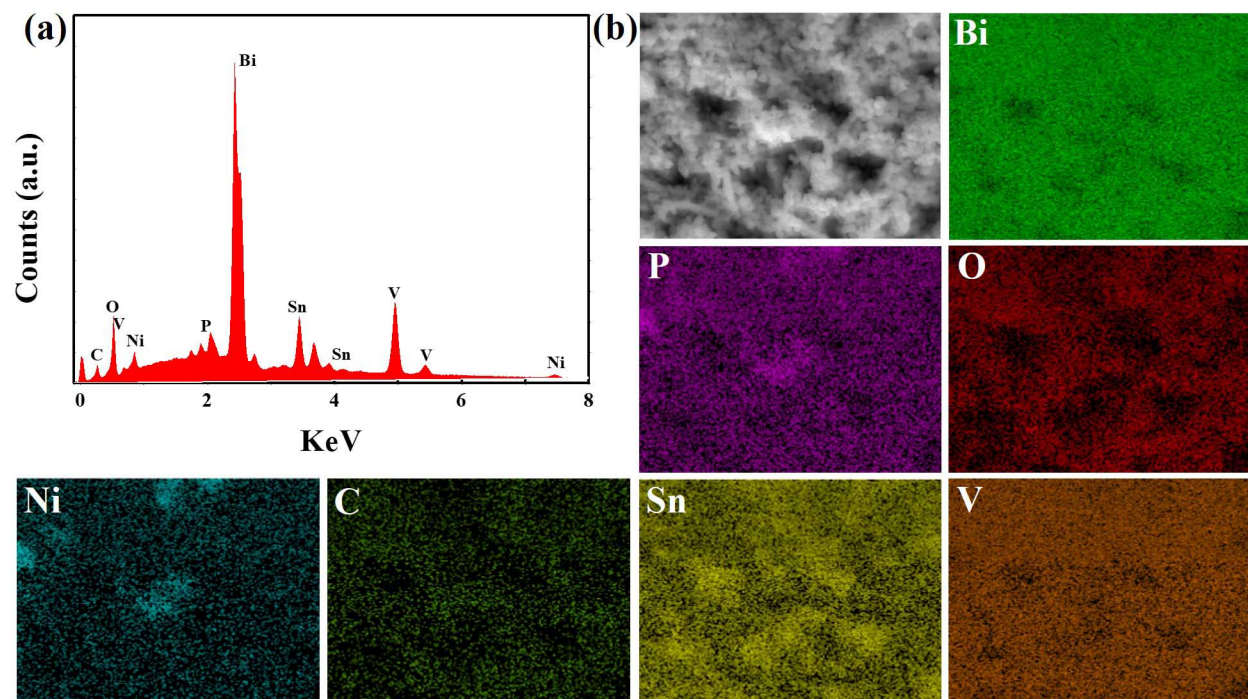

**Fig. S4** EDX analysis of BVO/Ni<sub>12</sub>P<sub>5</sub> photoanode.

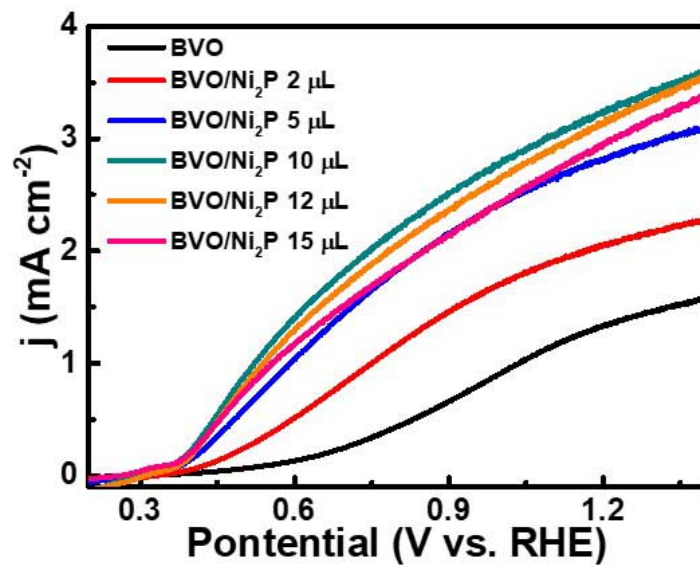

**Fig. S5** LSV curves of BVO/Ni<sub>2</sub>P photoanode with different loading amount of Ni<sub>2</sub>P.

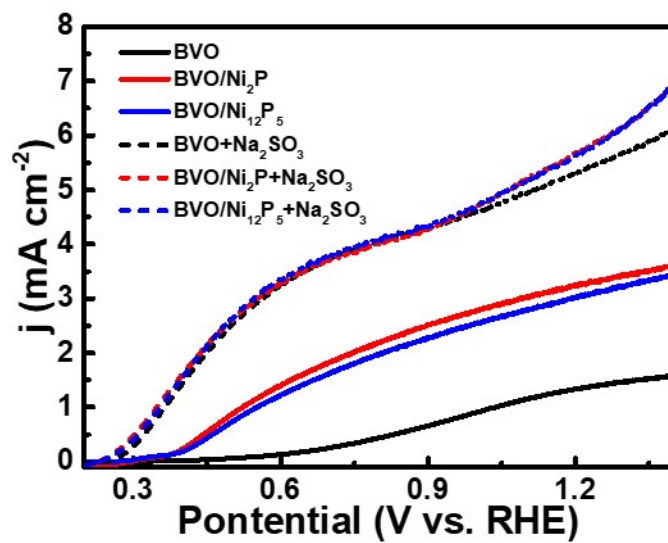

Fig. S6 LSV curves with and without Na<sub>2</sub>SO<sub>3</sub>.
